# Supplementary material
Source: PubMed Central journal article supplement (PMC4443928)
Supplement: NIHMS689618-supplement-Tables.pdf [file NIHMS689618-supplement-Tables.pdf]

Web Table 3. Nested Cross-Classified Multilevel Models (CCMM) Describing Association Between Predictors and Number of Days Smoked in the Past 30 Days and Binary Smoking Outcome in the National Longitudinal Study of Adolescent Health (N=16,070) adjusting for neighborhoods with one respondent (n=970)

|                                        | Number of Days<br>Smoked in Past 30 Days | Binary Smoking      |
|----------------------------------------|------------------------------------------|---------------------|
| <b>Fixed Effect Estimates</b>          |                                          |                     |
| Intercept (SE)                         | -8.40 (1.05)                             | 0.02 (0.01)         |
| <b>Individual-level</b>                |                                          |                     |
| <i>Age</i>                             | 0.81 (0.71, 0.90)                        | 1.18 (1.15, 1.21)   |
| <i>Female</i>                          | 0.06 (-0.21, 0.35)                       | 1.01 (0.94, 1.08)   |
| <i>Public Assistance</i>               | 0.68 (0.18, 1.17)                        | 1.36 (1.19, 1.56)   |
| <i>High School degree (parent)</i>     | -0.22 (-0.69, 0.25)                      | 0.98 (0.86, 1.12)   |
| <i>Race</i>                            |                                          |                     |
| White                                  | Ref                                      |                     |
| Black                                  | -4.13 (-4.63, -3.59)                     | 0.30 (0.26, 0.35)   |
| Hispanic                               | -1.84 (-2.36, -1.32)                     | 0.70 (0.61, 0.81)   |
| <i>Neighborhood has one respondent</i> | 0.44 (-0.17, 1.05)                       | 1.06 (0.89, 1.24)   |
| <b>School-level</b>                    |                                          |                     |
| <i>Public Assistance</i>               | 0.07 (0.02, 0.12)                        | 1.02 (1.01, 1.03)   |
| <i>High School Degree</i>              | -0.04 (-0.09, 0.003)                     | 0.99 (0.98, 1.00)   |
| <i>Percent White</i>                   | 0.02 (0.001, 0.03)                       | 1.01 (1.00, 1.01)   |
| <b>Neighborhood-level</b>              |                                          |                     |
| <i>Public Assistance</i>               | -0.005 (-0.04, 0.03)                     | 0.99 (0.98, 1.01)   |
| <i>High School Degree</i>              | 0.01 (-0.01, 0.03)                       | 1.005 (1.00, 1.01)  |
| <i>Percent White</i>                   | 0.0002 (-0.01, 0.01)                     | 0.998 (0.995, 1.00) |
| <b>Random Effect Estimates</b>         |                                          |                     |
| U3 neighborhood (SE)                   | 0.21 (0.05, 0.50)*                       | 0.01 (0.003, 0.02)  |
| U2 school (SE)                         | 1.79 (1.17, 2.60)*                       | 0.10 (0.06, 0.16)*  |
| U1 individual (SE)                     | 80.6 (78.8, 82.4)*                       | -                   |

For the fixed effect estimates, cell entries are parameter (beta) estimates and credible intervals for continuous days smoked outcome and parameter (OR) estimates and credible intervals for binary smoking outcome. The intercept is presented as parameter estimate and standard error (SE). Random effects are presented as estimate and credible intervals. Significant random effects are indicated by \* ( $p < 0.05$ ).
